# Supplementary material
Source: Elsevier journal article supplement (https://www.sciencedirect.com/science/article/pii/S2531043722001258)
Supplement: mmc1 [file S2531043722001258:mmc1.docx]

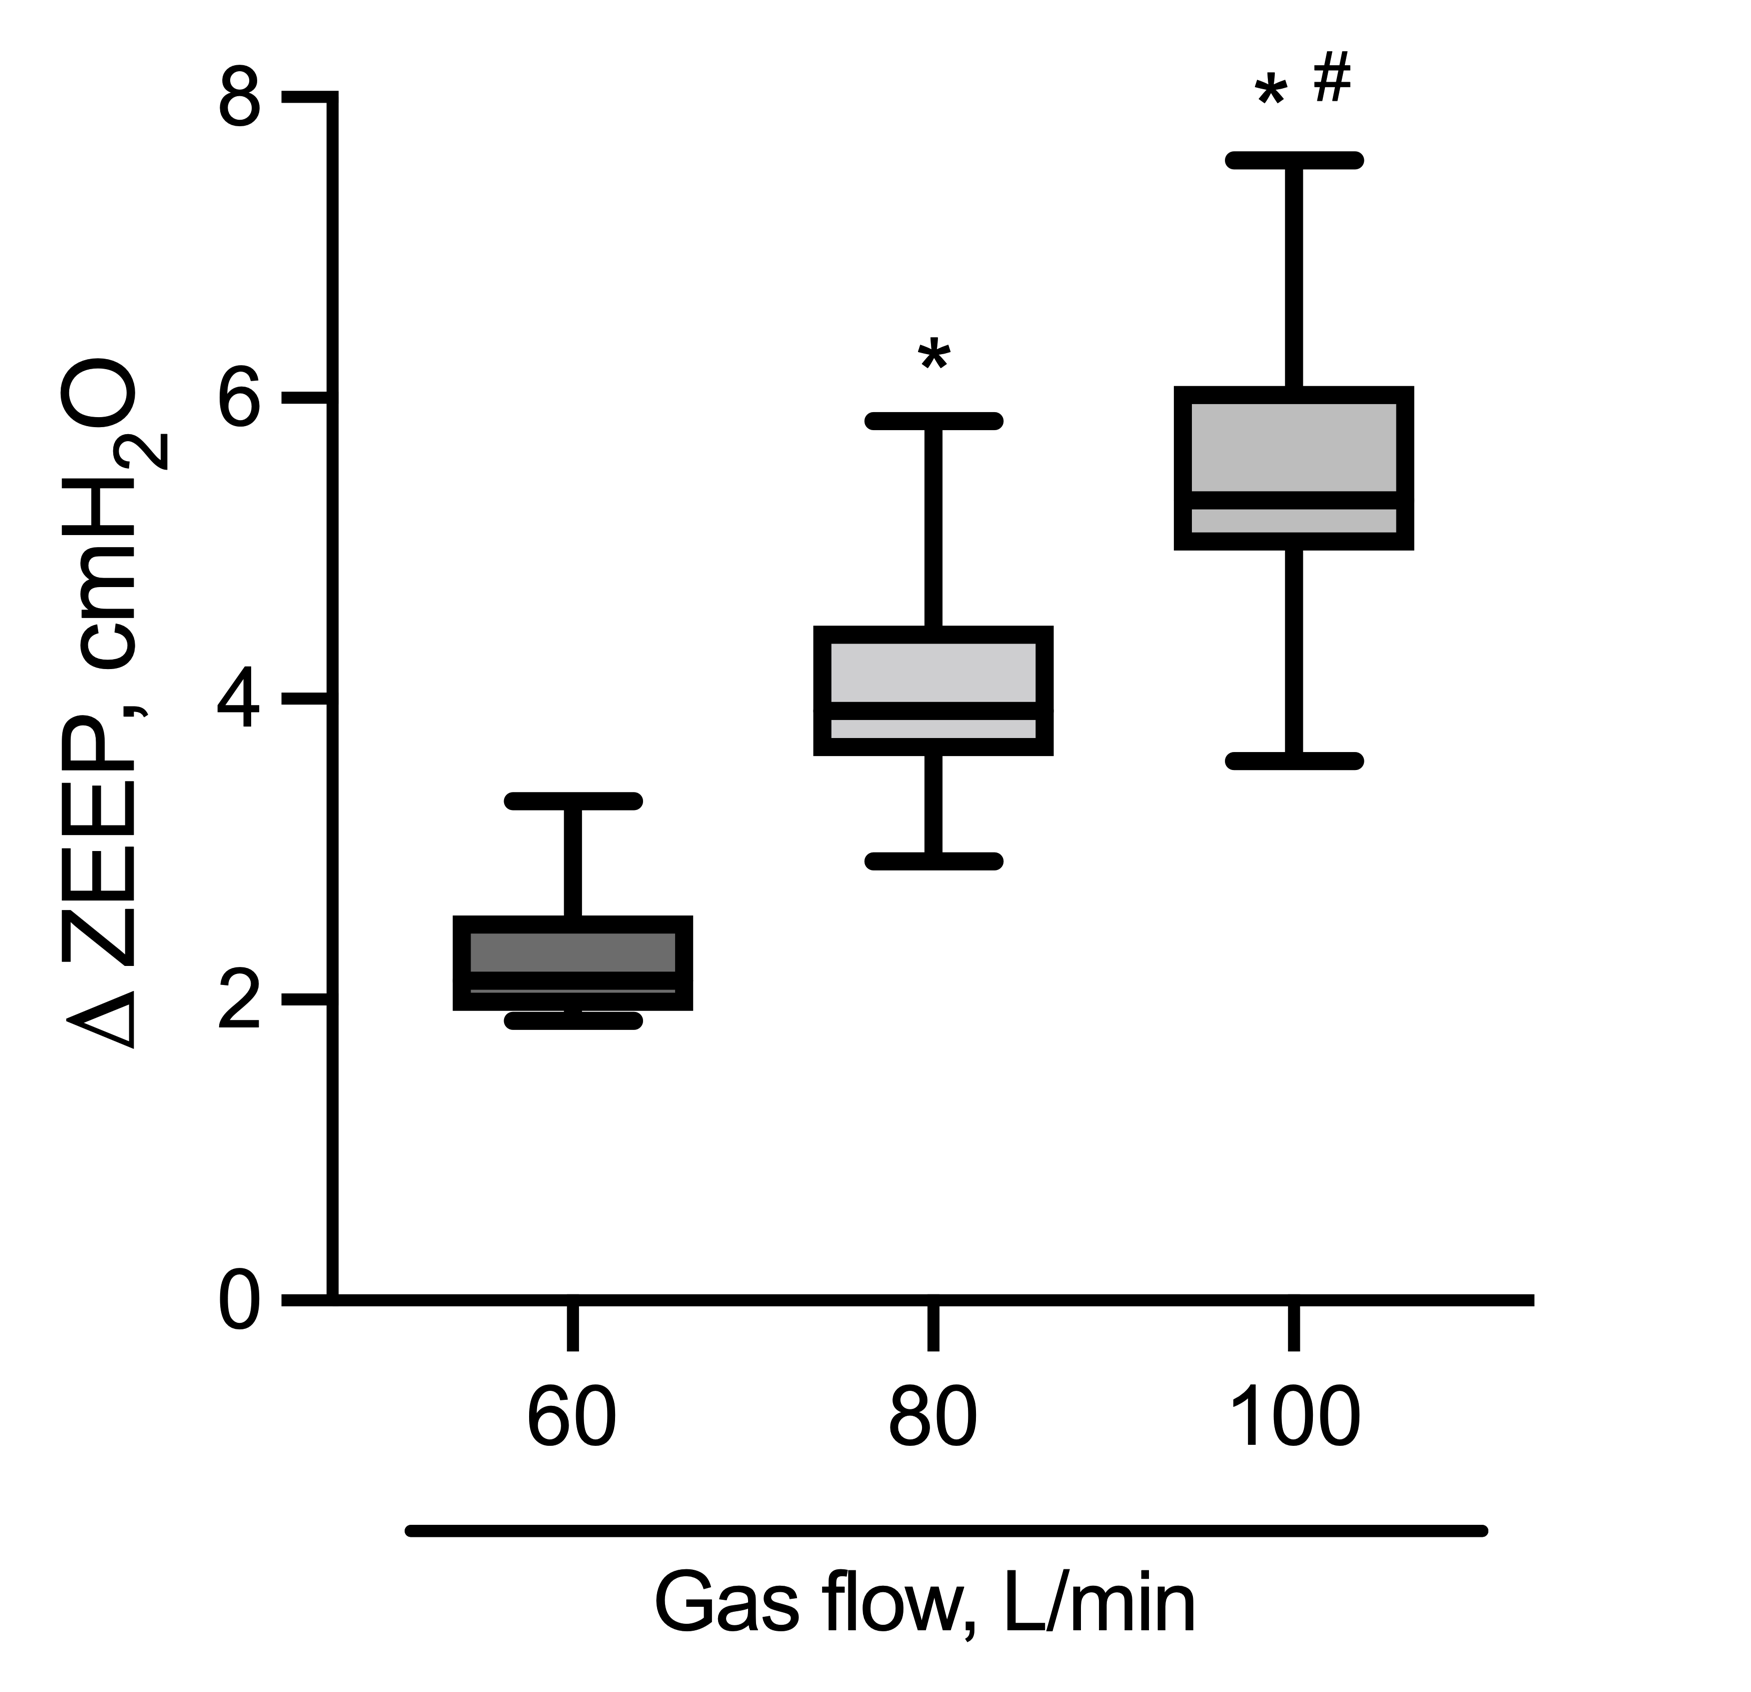


**Supplemental Figure 1.** This figure represents the median change in airway pressure within the hood of the helmet CPAP (ΔZEEP) using different HEPA and HMEF filters across increasing gas flows and in the absence of a mechanical PEEP valve. Whiskers plots represent median change of airway pressure with interquartile and overall range (i.e. minimum and maximum) using 8 studied HEPA/HMEF filters. * P<0.05 versus 60 L/min. # p<0.05 versus 80 L/min.

**
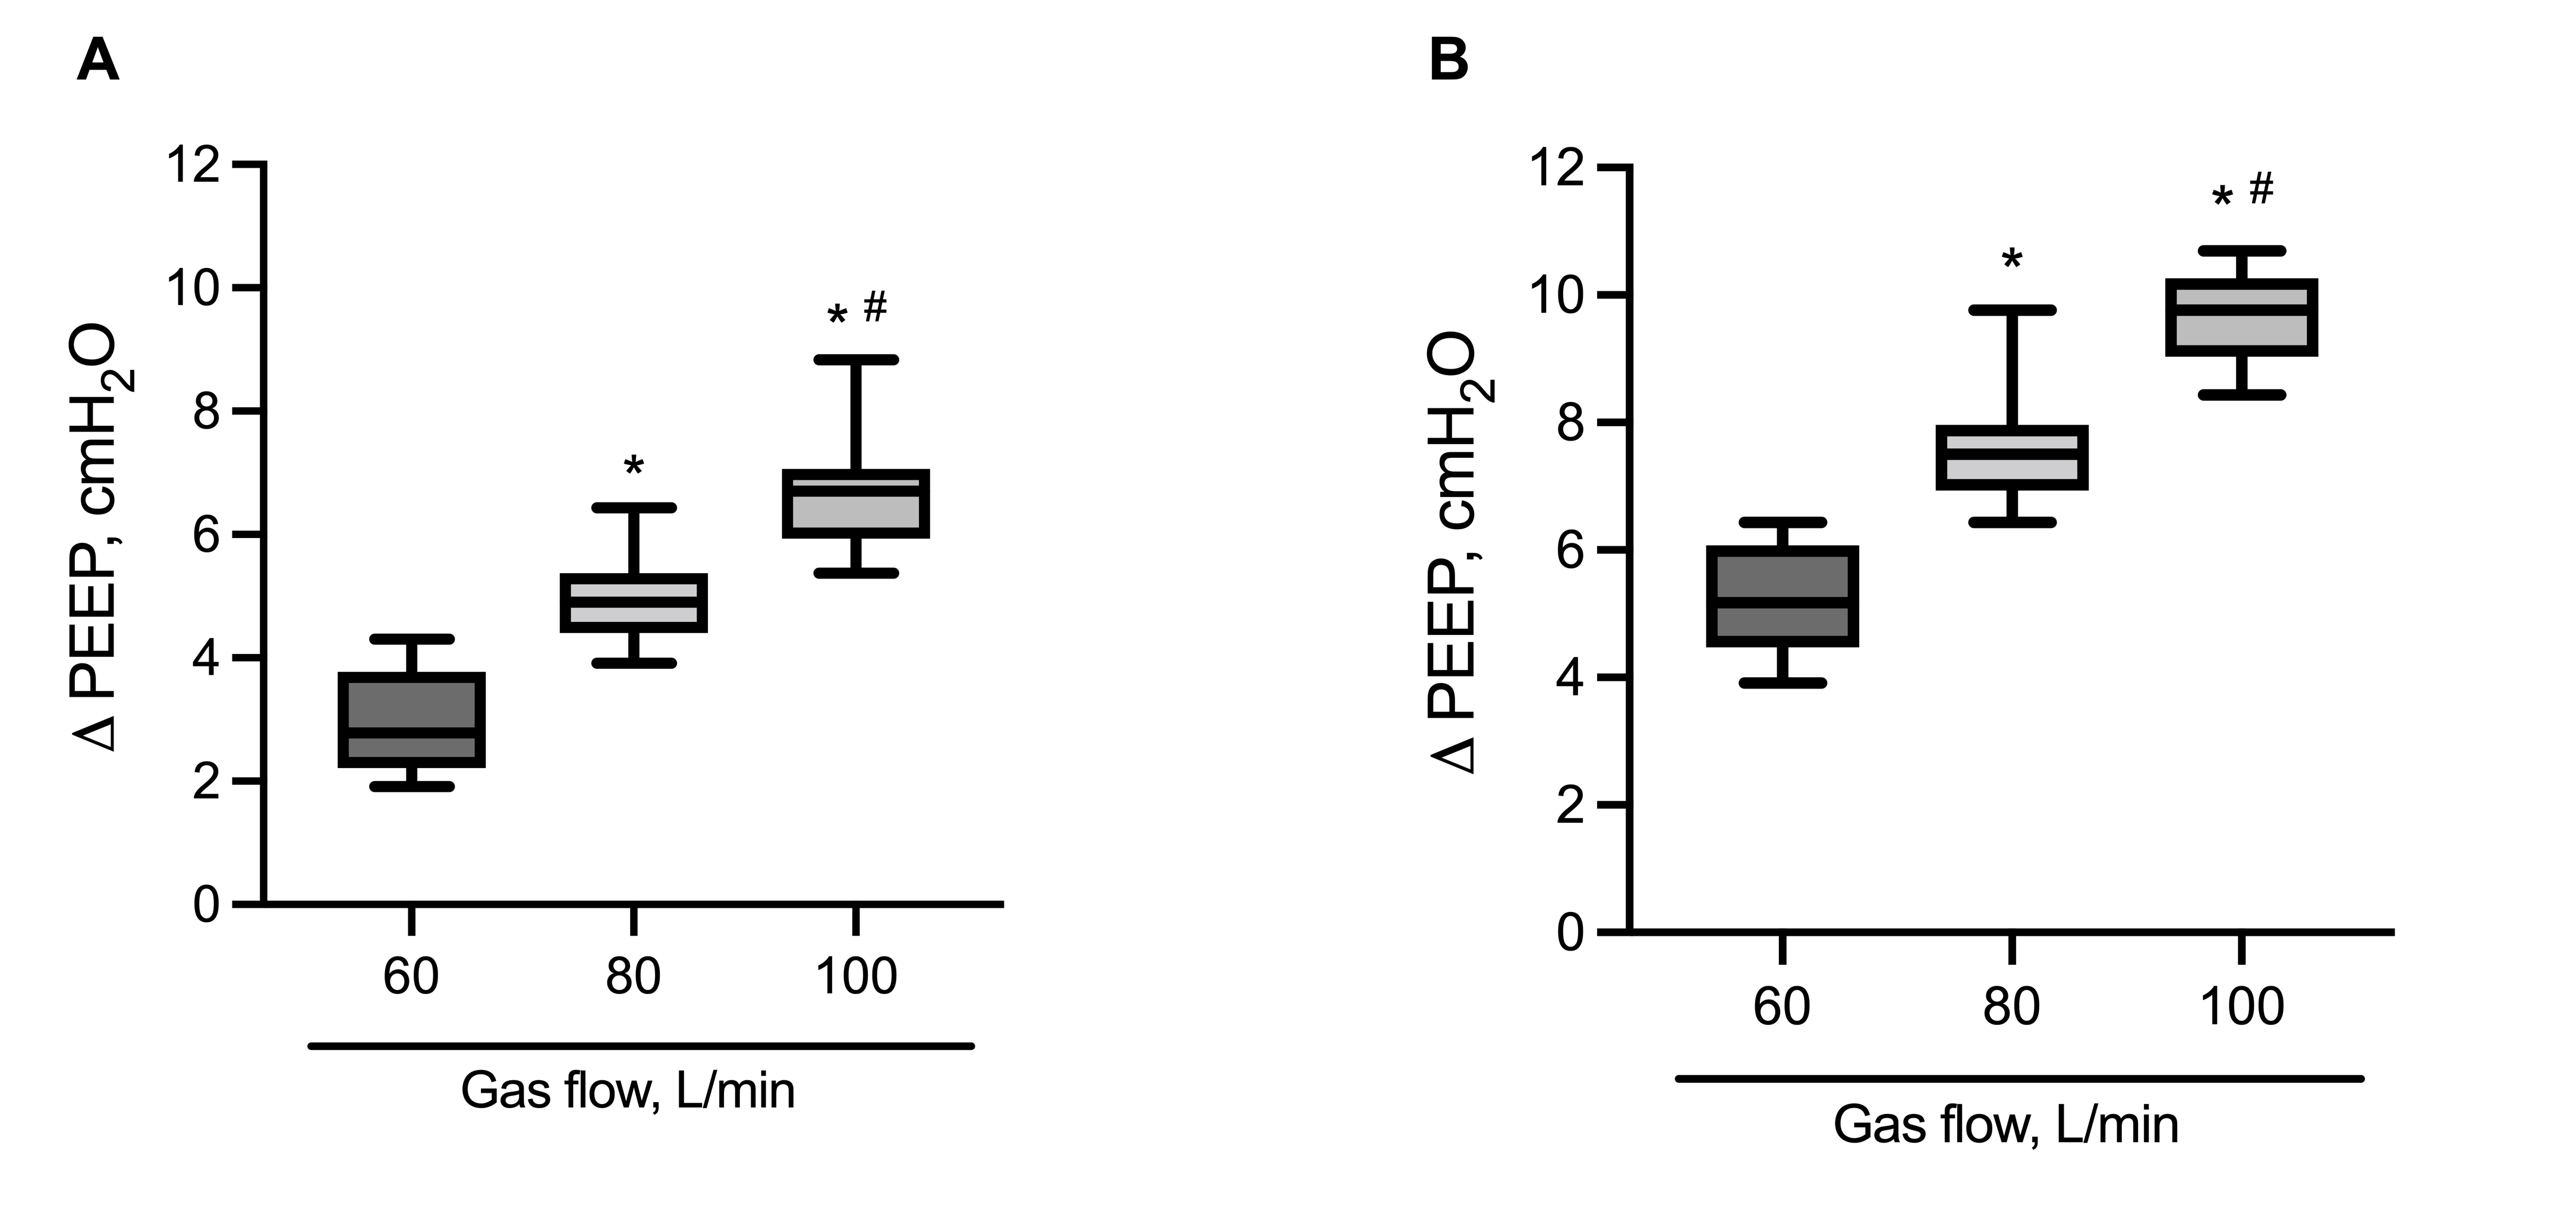
**

**Supplemental Figure 2.** This figure represents the average change in airway pressure within the hood of the helmet CPAP (ΔPEEP) using different HEPA and HMEF filters across increasing gas flows and in the presence the mechanical PEEP valve 1 (**panel A**) and 2 (**panel B**) at set PEEP=5 cmH2O. Data include the effect of PEEP valve on increasing ΔPEEP at increasing gas flow rates. Whiskers plots represent median change of airway pressure with interquartile and overall range (i.e. minimum and maximum) using 8 studied HEPA/HMEF filters. * P<0.05 versus 60 L/min. # p<0.05 versus 80 L/min.

**
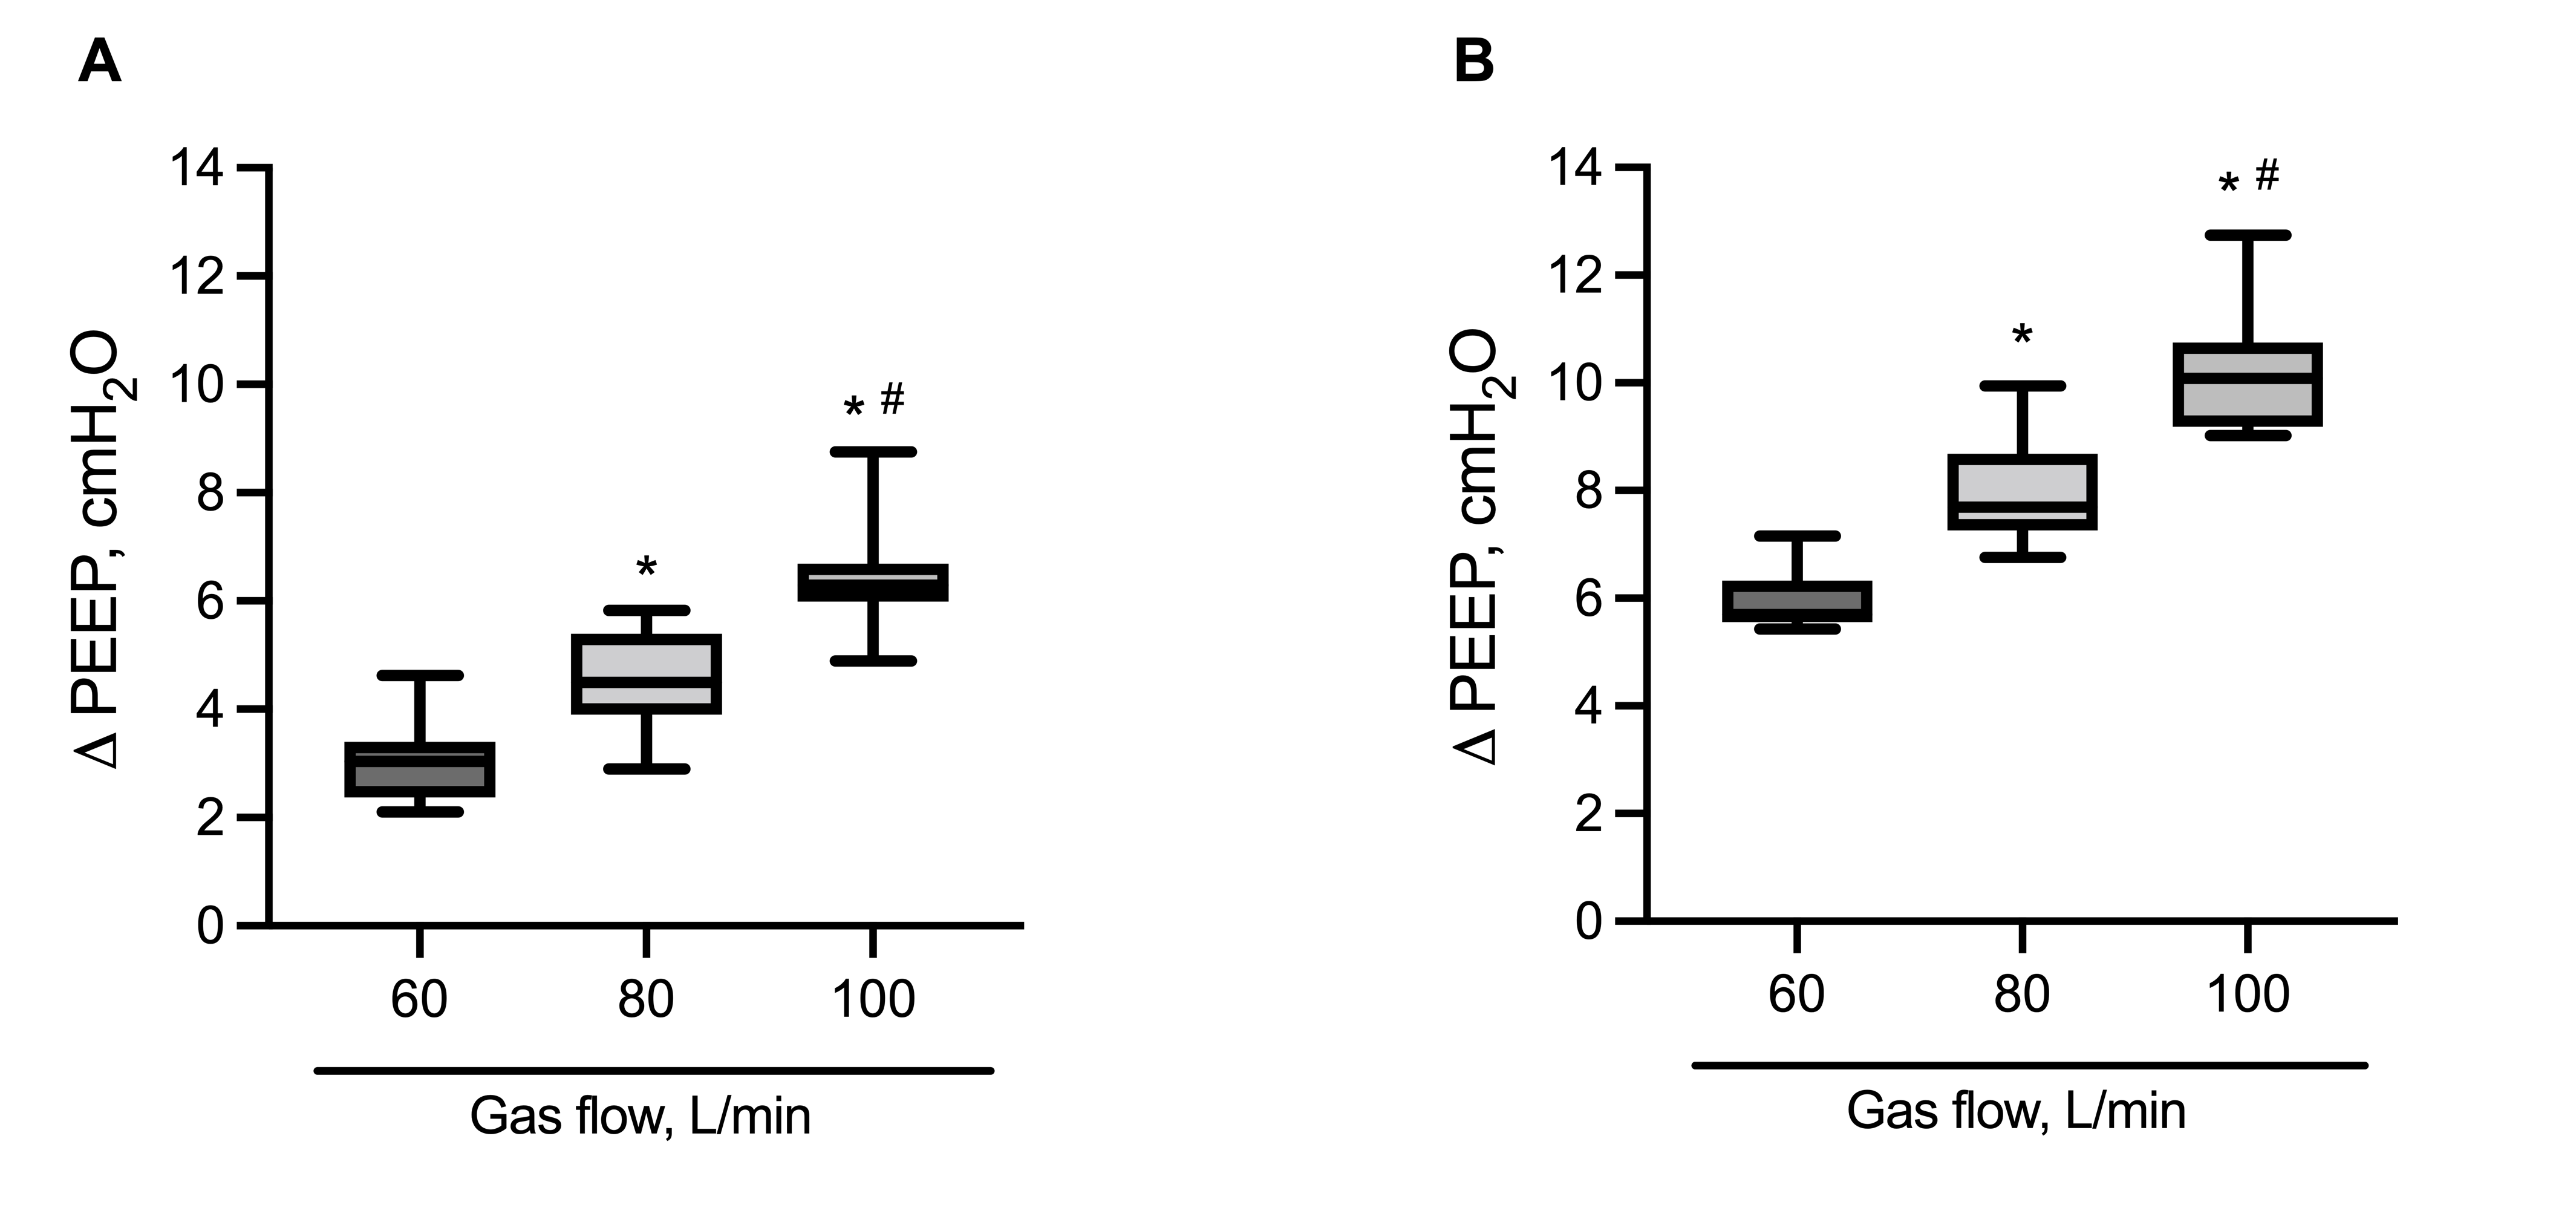
**

**Supplemental Figure 3.** This figure represents the average change in airway pressure within the hood of the helmet CPAP (ΔPEEP) using different HEPA and HMEF filters across increasing gas flows and in the presence the mechanical PEEP valve 1 (**panel A**) and 2 (**panel B**) at set PEEP=10 cmH2O. Data include the effect of PEEP valve on increasing ΔPEEP at increasing gas flow rates. Whiskers plots represent median change of airway pressure with interquartile and overall range (i.e. minimum and maximum) using 8 studied HEPA/HMEF filters. * P<0.05 versus 60 L/min. # p<0.05 versus 80 L/min.
